# Supplementary material
Source: publisher site journal article supplement (https://www.spandidos-publications.com/8696/downloadSupplementary)

Figure S1. Schematic diagram of the phenylalanine metabolic pathway.

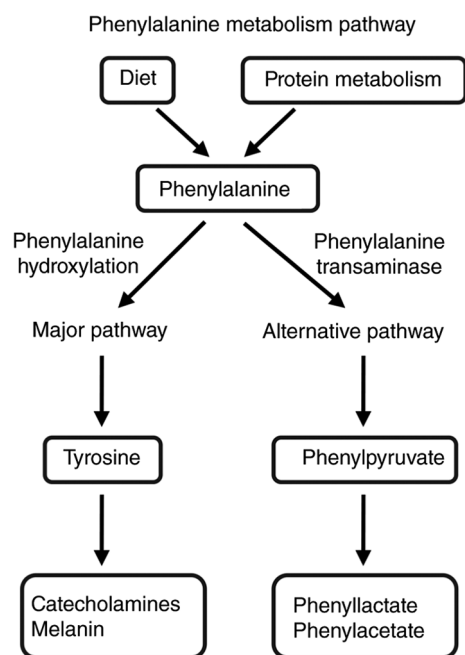

Figure S2. Daily assessment of clinical PASI scores in imiquimod-induced psoriasis-like mice fed with different doses of phenylalanine. (A) Daily scoring of skin thickness. (B) Daily scoring of scaling. (C) Daily scoring of erythema. (D) Total PASI scores over the 6-day period. Statistical significance was determined using two-way ANOVA, followed by Tukey's multiple comparisons test. \* $P < 0.05$ . ns, not significant; PASI, Psoriasis Area and Severity Index.

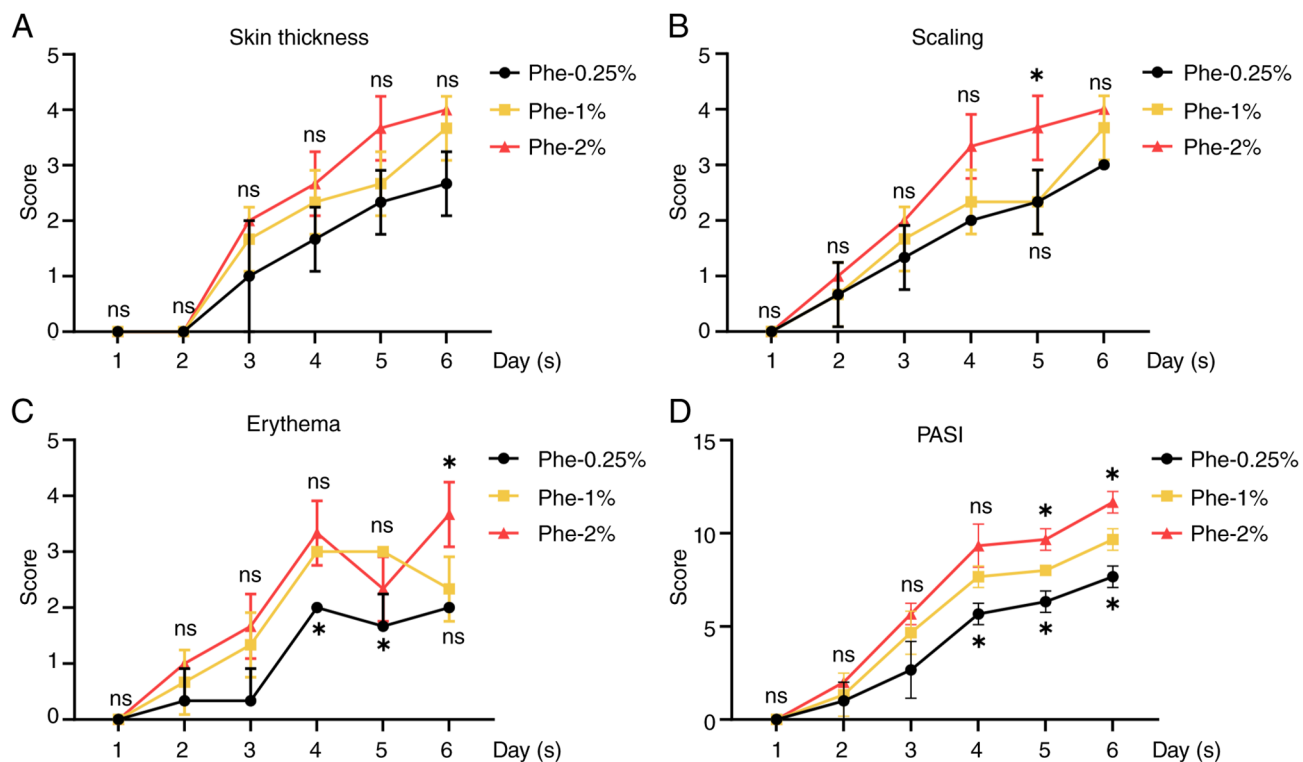

Figure S3. Daily assessment of clinical PASI scores following JPH203 treatment in IMQ-induced psoriasis-like mice. (A) Daily scoring of skin thickness. (B) Daily scoring of scaling. (C) Daily scoring of erythema. (D) Total PASI scores over the 6-day period. Statistical significance was determined using two-way ANOVA, followed by Tukey's multiple comparisons test. \* $P < 0.05$ . ns, not significant; PASI, Psoriasis Area and Severity Index; NC, normal control; IMQ, imiquimod.

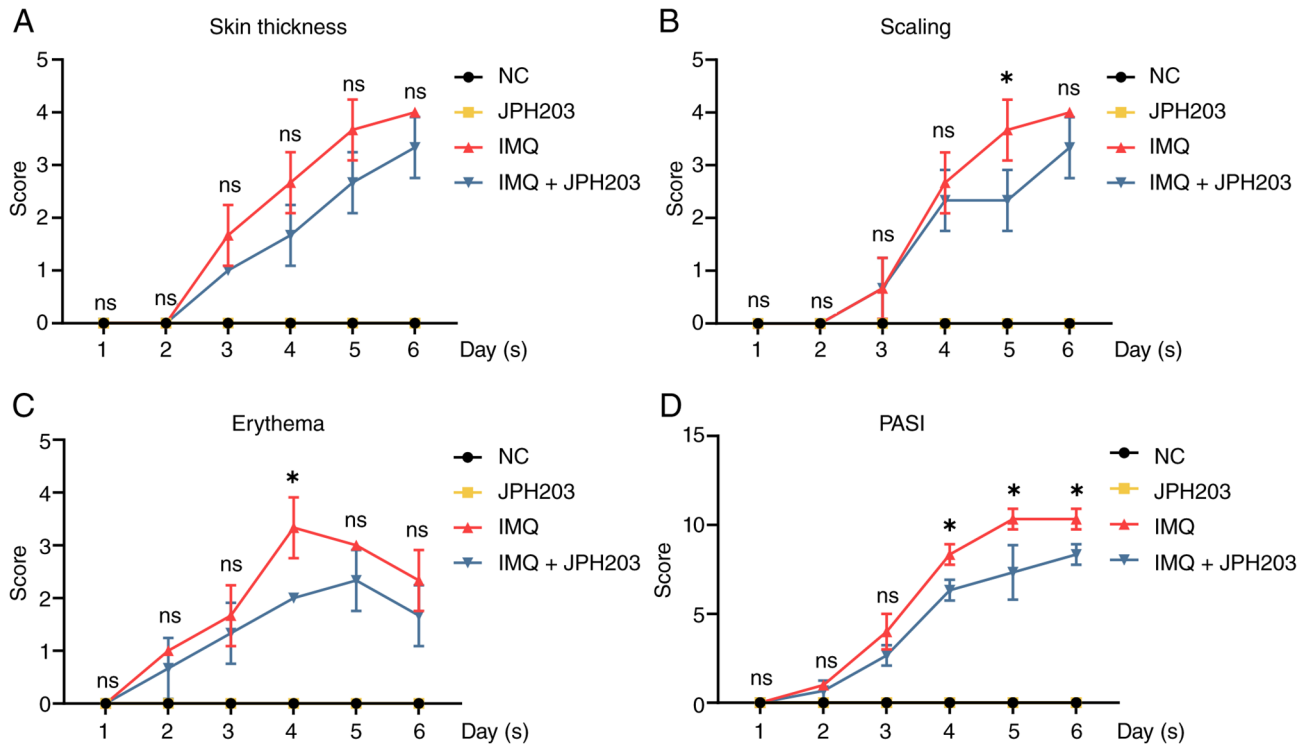

Supplement: Supplementary file 1 [file downloadSupplementary]
